# Supplementary material for: Multifunctional Nanofibrous Dressing with Antimicrobial and Anti-Inflammatory Properties Prepared by Needle-Free Electrospinning
Source: MDPI journal article supplement (doi:10.3390/pharmaceutics13091527), 2021-09-21
Supplement: s1 [file s1]

# Supplementary Materials: Multifunctional Nanofibrous Dressing with Antimicrobial and Anti-inflammatory Properties prepared by Needle-free Electrospinning

Laura Victoria Schulte-Werning, Anjanah Murugaia, Bhupender Singh, Mona Johannessen, Rolf Einar Engstad, Nataša Škalko-Basnet, Ann Mari Holsæter

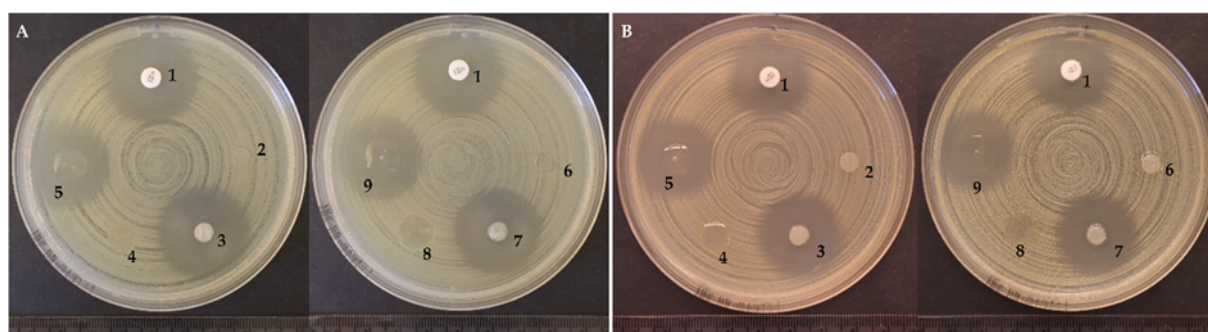

**Figure S1.** Antibacterial activity of nanofibers. Inhibition of (A) *E. coli* and (B) *S. aureus* by chloramphenicol (1, positive control), (2)  $\beta$ G-CHI-nf, (3)  $\beta$ G-CHI-CAM-nf, (4)  $\beta$ G, (5)  $\beta$ G-CAM-nf, (6) CHI-nf, (7) CHI-CAM-nf, (8) Copol-nf, (9) Copol-CAM-nf. Abbreviations:  $\beta$ G ( $\beta$ -glucan), CHI (chitosan), Copol (co-polymers: polyethylene oxide and hydroxypropylmethylcellulose), CAM (chloramphenicol), nf (nanofiber).

**Table S1.** Weight of the nanofibrous mats (square, 2 x 2 cm) used for the swelling index testing (n=3).

| Batch | Weight nanofibrous mats (mg) |            |
|-------|------------------------------|------------|
|       | $\beta$ G-CHI-CAM-nf         | CHI-CAM-nf |
| 1     | 6.3                          | 11.5       |
|       | 8.9                          | 17.2       |
|       | 7.2                          | 8.8        |
| 2     | 4.5                          | 9.1        |
|       | 6.7                          | 13.1       |
|       | 8.8                          | 10.1       |
| 3     | 4.3                          | 4.8        |
|       | 6.5                          | 7.9        |
|       | 6.7                          | 10.5       |

Abbreviations:  $\beta$ G ( $\beta$ -glucan), CHI (chitosan), Copol (co-polymers: polyethylene oxide and hydroxypropylmethylcellulose), CAM (chloramphenicol), nf (nanofiber).

**Table S2.** Weight of the nanofibrous mats (round, diameter = 9 mm) used for the drug release testing (n=2).

| Batch | Weight nanofibrous mats (mg) |                  |            |              |
|-------|------------------------------|------------------|------------|--------------|
|       | $\beta$ G-CHI-CAM-nf         | $\beta$ G-CAM-nf | CHI-CAM-nf | Copol-CAM-nf |
| 1     | 9.0                          | 9.6              | 9.8        | 8.3          |
|       | 8.3                          | 7.9              | 9.2        | 7.2          |
| 2     | 8.3                          | 8.3              | 9.0        | 8.9          |
|       | 8.8                          | 7.9              | 9.6        | 8.3          |
| 3     | 10.6                         | 9.4              | 11.5       | 10.1         |
|       | 10.2                         | 9.6              | 10.7       | 9.9          |

Abbreviations:  $\beta$ G ( $\beta$ -glucan), CHI (chitosan), Copol (co-polymers: polyethylene oxide and hydroxypropylmethylcellulose), CAM (chloramphenicol), nf (nanofiber).
